# Supplementary material for: Influence of moisture on the electrical properties of solution processed multilayer high-k ZrO2-capacitors
Source: Royal Society of Chemistry journal article supplement (doi:10.1039/c5ra15782j), 2015-01-01
Supplement: c5ra15782j1.pdf [file c5ra15782j1.pdf]

## Supporting Information: Figures

### Influence of Moisture on the Electrical Properties of Solution Processed Multilayer High-k ZrO<sub>2</sub>-Capacitors

Mareiki Kaloumenos\*<sup>a</sup>, Philipp Pacak<sup>a</sup>, Rudolf Hoffmann<sup>b</sup>, Dieter Spiehl<sup>c</sup>, Klaus Hofmann<sup>a</sup>, and Klaus Bonrad<sup>d</sup>

<sup>a</sup>Department of Electrical Engineering and Information Technology, Integrated Electronic Systems Lab, Technische Universität Darmstadt, Merckstr. 25, 64283 Darmstadt, Germany.

<sup>b</sup>Department of Chemistry, Eduard-Zintl-Institute, Inorganic Chemistry, Technische Universität Darmstadt, Alarich-Weiss-Str. 12, 64287 Darmstadt, Germany.

<sup>c</sup>Department of Mechanical Engineering, Institute of Printing Science and Technology, Technische Universität Darmstadt, Magdalenenstr. 2, D-64289 Darmstadt, Germany.

<sup>d</sup>Merck KGaA, Frankfurter Str. 250, 64293 Darmstadt, Germany.

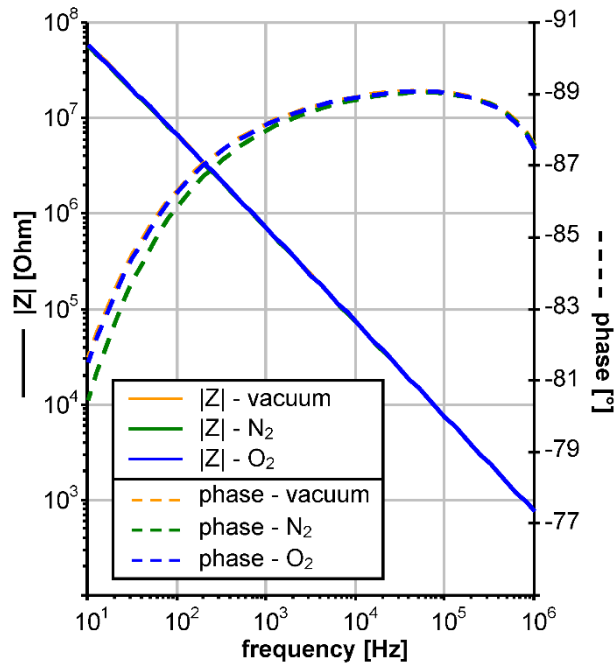

**Fig. S1** Impedance (absolute value  $|Z|$  and phase  $\theta$ ) of a device measured after several hours in vacuum, in vacuum with adding  $N_2$  and in vacuum with adding  $O_2$  (Table 1, condition c)). No significant influence on the impedances could be observed during observations for approx. 20 minutes.

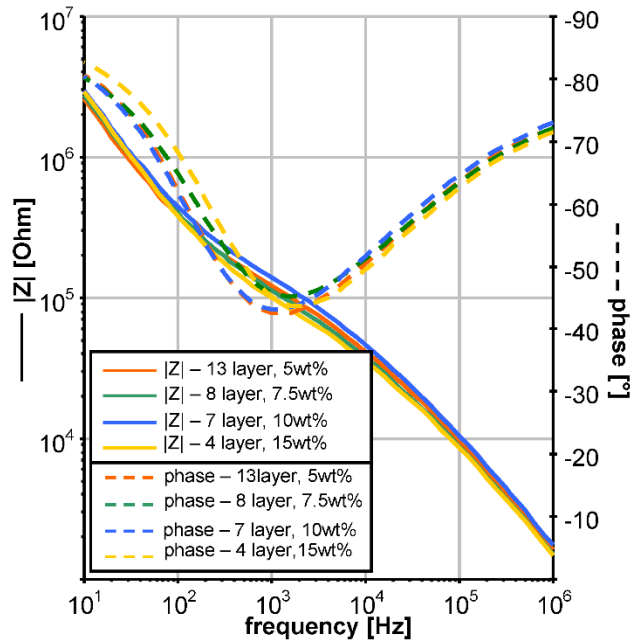

**Fig. S2** Impedance (absolute value  $|Z|$  and phase  $\theta$ ) of four devices with different precursor concentrations and number of layers, resulting in the same total film thickness of  $\sim 200$ nm measured in air (Table 1, condition b)). No significant difference can be seen between the impedance of these devices. Small deviations are connected to the absence of a perfectly identical layer thickness (checked via REM and XRR).

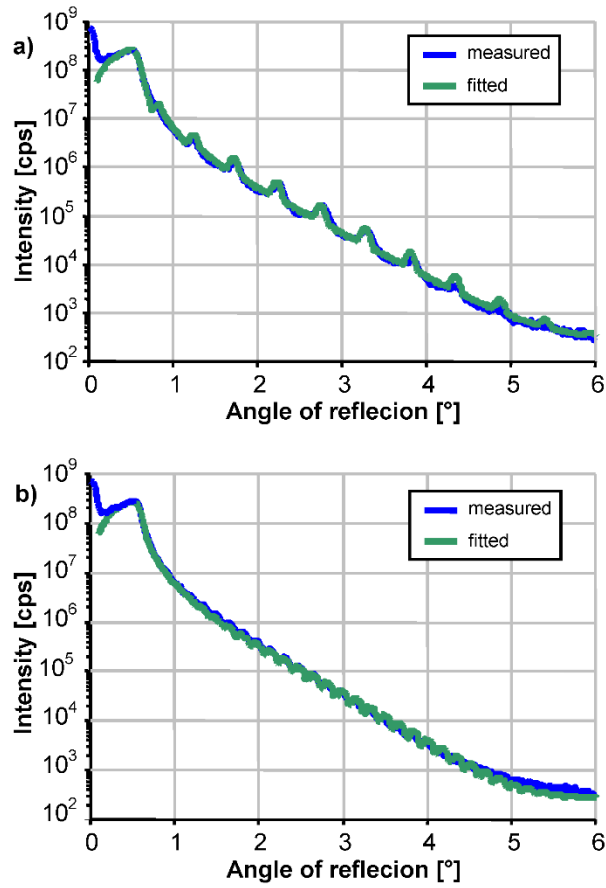

**Fig. S3** XRR data and fit for two devices: a) 13 layers with 5% precursor concentration, resulting in a density of  $4,4\text{g/cm}^3$ , a surface roughness of  $6,2\text{\AA}$  and a single layer thickness of  $\sim 15\text{nm}$  and b) 4 layers with 15% precursor concentration, resulting in a density of  $4,4\text{g/cm}^3$ , a surface roughness of  $5,9\text{\AA}$  and a single layer thickness of  $\sim 51\text{nm}$ .

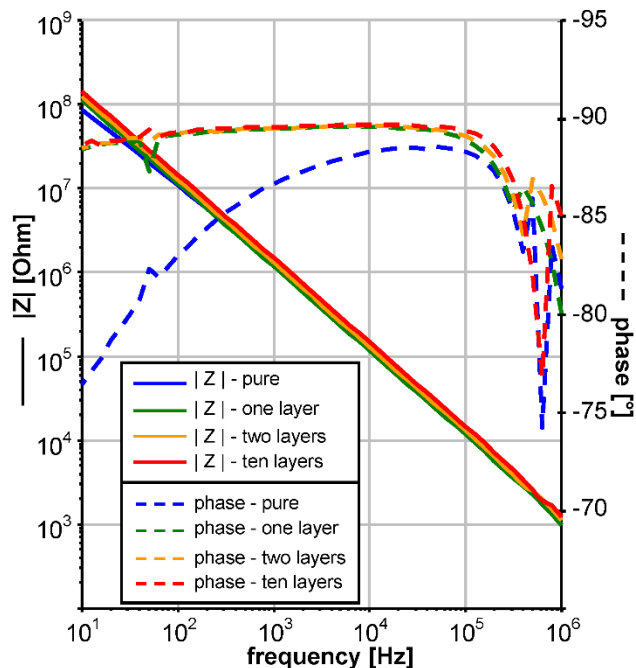

**Fig. S4** Impedance (absolute value  $|Z|$  and phase  $\theta$ ) of four devices with different number of layers on top of the physical device measured after 10min at 130°C in argon (Table 1, condition a)): no encapsulation (pure), one layer, two layers and ten layers. A difference in the impedance can be observed between measurement data achieved with encapsulation or no encapsulation, although there is no significant influence of the number of encapsulation layers observable. The fluctuation of the phase in the high frequency regime can be neglected given that it is caused by the measuring instrument.

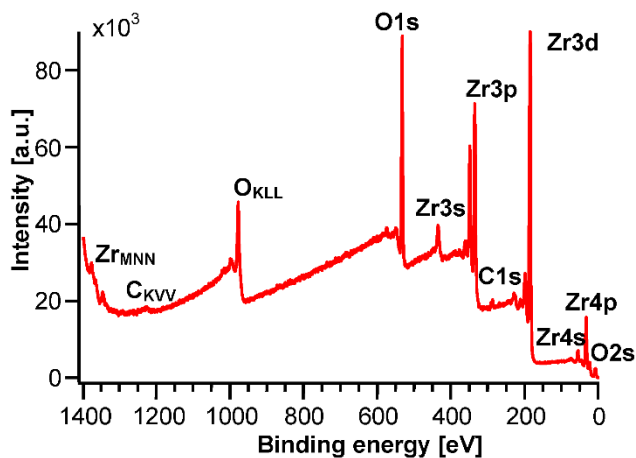

**Fig. S5** Wide scan energy spectrum of  $ZrO_2$  sample measured per XPS.
